# Supplementary material for: A New HPV score System Predicts the Survival of Patients With Cervical Cancers
Source: Front Genet. 2021 Dec 1;12:747090. doi: 10.3389/fgene.2021.747090 (PMC8672055; doi:10.3389/fgene.2021.747090)
Supplement: Supplementary file 8 [file Table1.XLSX]

## Sheet: SupplementaryTable1_degs_mRNA
	logFC	AveExpr	t	P.Value	adj.P.Val	B
UBBP1	0.807543	0.593925	6.37292	2.20556e-09	6.43881e-05	10.0667
MAZ	-0.799752	4.30639	-5.48263	1.75783e-07	0.000977056	5.78001
AC073325.2	0.711805	0.55308	5.42302	2.32411e-07	0.000977056	5.50778
SNORD83A	-0.699845	1.3364	-5.17496	7.28081e-07	0.00181312	4.39649
MIR4664	-0.980708	2.06892	-5.13548	8.70453e-07	0.00181312	4.22296
TMX2P1	-0.657077	2.1248	-5.11766	9.43306e-07	0.00181312	4.1449
RP1-159A19.3	0.645928	1.10038	5.03459	1.36863e-06	0.00190263	3.78367
RGS1	1.25715	2.78237	4.99637	1.62216e-06	0.00220262	3.61885
GADD45B	0.833407	3.97268	4.95429	1.95393e-06	0.0025352	3.43848
SNORD104	-0.947417	4.72831	-4.94461	2.03917e-06	0.00254562	3.3971
MIR210	-0.911675	1.47766	-4.89522	2.53295e-06	0.00290641	3.18707
CCDC34	0.701554	2.73052	4.89471	2.53869e-06	0.00290641	3.18488
HMGB1P10	0.642941	2.18034	4.87992	2.70824e-06	0.00304088	3.12229
TAF6	-0.604209	3.46549	-4.7667	4.42398e-06	0.00423447	2.64763
HSPB1P1	1.34531	3.77488	4.74863	4.78092e-06	0.00443085	2.57265
TRIM25	-0.617335	3.7051	-4.72029	5.39779e-06	0.00470389	2.45542
MT1XP1	0.616097	1.10108	4.68819	6.18951e-06	0.00516267	2.32328
PTMAP5	0.629824	2.06389	4.63485	7.75892e-06	0.0061076	2.10523
RP11-977G19.5	0.680494	3.26596	4.62909	7.95002e-06	0.0061076	2.08177
HES1	0.780848	5.64859	4.59872	9.03384e-06	0.00659323	1.95856
FOXK1	-0.597067	2.61734	-4.57323	1.00523e-05	0.00677945	1.85562
RP11-927P21.4	-0.804908	2.59337	-4.56462	1.04205e-05	0.00677945	1.82096
AC132812.1	-0.586048	0.842339	-4.54695	1.12181e-05	0.00711949	1.74992
EDN2	1.85209	2.98132	4.50377	1.34217e-05	0.00807889	1.57728
HSPD1	-0.610999	6.28149	-4.46811	1.55504e-05	0.00873018	1.43566
CTD-2262B20.1	0.660621	1.00563	4.45088	1.66927e-05	0.00904819	1.36751
FASN	-0.801695	4.81248	-4.4424	1.72836e-05	0.00904819	1.33406
LENG8	-0.764357	4.64495	-4.4144	1.93818e-05	0.00927577	1.22396
MFSD3	-0.671169	3.41808	-4.34982	2.51983e-05	0.0113173	0.971976
CD1C	0.714392	0.952503	4.33026	2.72678e-05	0.0117932	0.896251
TECRP1	0.605501	2.06092	4.27664	3.38134e-05	0.0133762	0.689992
AC107983.4	0.766232	1.84442	4.26262	3.57598e-05	0.0139194	0.636374
TMEM54	0.813984	6.38295	4.2051	4.49274e-05	0.0156296	0.41789
RP11-347I19.8	-0.655705	1.69613	-4.08762	7.11231e-05	0.0207633	-0.0210462
TSC22D3	0.822711	3.93687	4.0762	7.43345e-05	0.0210688	-0.0631847
FABP5P1	0.956292	1.25272	4.04241	8.46677e-05	0.0217595	-0.187311
SOX12	-0.746345	2.90489	-4.03566	8.68912e-05	0.0217739	-0.212021
FOS	1.33935	5.92053	4.01843	9.28199e-05	0.0223643	-0.274919
ATF3	1.01099	3.72556	3.95464	0.000118302	0.0260138	-0.505858
RAVER1	-0.592381	2.67525	-3.93774	0.000126098	0.0270419	-0.566555
ASF1B	0.589504	5.0815	3.91748	0.00013609	0.0279785	-0.639043
MIR25	-0.646874	3.58221	-3.9063	0.00014192	0.0285733	-0.6789
GPR183	0.733681	1.95316	3.87399	0.000160139	0.0310632	-0.793605
SMIM3	0.871904	3.30449	3.85584	0.000171319	0.0321508	-0.857656
CDKN1A	0.846733	6.59431	3.84734	0.000176815	0.0327363	-0.887613
PRRC2B	-0.64075	3.6058	-3.84678	0.000177178	0.0327363	-0.889559
RP11-626G11.6	0.626934	1.33889	3.83682	0.000183839	0.0332257	-0.924566
HMGN2P3	0.61493	1.93341	3.78209	0.00022488	0.0368967	-1.11553
DUSP1	1.18572	5.94843	3.78045	0.000226232	0.0368967	-1.1212
MIR3176	-0.679299	1.36415	-3.77407	0.00023158	0.0370445	-1.14332
PADI1	1.16604	1.49608	3.769	0.00023591	0.0372272	-1.16086
TCP11	0.806642	1.19562	3.75162	0.000251356	0.0389282	-1.22088
NME4	-0.830194	3.60327	-3.73189	0.00027004	0.0402215	-1.2887
SYTL1	0.693123	3.72411	3.70909	0.000293276	0.041663	-1.36672
ZFP36	0.944296	6.36661	3.6966	0.000306789	0.0425533	-1.40928
DHRS3	0.81926	5.32632	3.68669	0.000317934	0.043372	-1.44299
MIR647	-0.695664	2.71805	-3.67467	0.000331958	0.0438336	-1.48374
TNFSF10	1.23691	6.33544	3.65993	0.000349959	0.0450067	-1.53358
VPS9D1-AS1	-0.679071	2.11189	-3.64813	0.000365034	0.0452083	-1.57337
MIR4292	-0.59882	2.58498	-3.64179	0.000373371	0.0455314	-1.59467
SLC5A6	-0.585894	3.26805	-3.6405	0.000375094	0.0455314	-1.59901
CTB-63M22.1	0.828507	3.02691	3.63811	0.000378305	0.045826	-1.60705
S100B	0.900231	1.89423	3.63324	0.000384916	0.0460914	-1.62338
LRFN4	-0.73202	3.05526	-3.61987	0.000403659	0.0471374	-1.6682
FCER1A	0.816933	1.12014	3.61986	0.000403663	0.0471374	-1.66821
EGR1	1.06682	5.6375	3.61916	0.000404673	0.047161	-1.67056
CTCFL	0.94796	0.879592	3.60449	0.000426253	0.0486426	-1.71951
TAF7L	0.881885	1.18765	3.5803	0.000464243	0.0499132	-1.7999
RP11-425L10.1	0.676649	3.52079	3.57841	0.000467348	0.0499132	-1.80618
CENPW	0.793589	5.83302	3.5673	0.000485966	0.0507587	-1.84294
MEI1	1.13855	1.8322	3.55592	0.000505748	0.051431	-1.88047
ITPKC	0.62931	4.835	3.54945	0.000517338	0.0519	-1.90178
SMC1B	0.834537	2.05112	3.54703	0.00052174	0.0520421	-1.90974
CTD-2031P19.4	0.603925	3.01308	3.54671	0.000522319	0.0520421	-1.91079
MIR1254-1	-0.631017	1.6313	-3.52869	0.000556228	0.0546742	-1.96991
HMGN5	0.927605	1.88812	3.52224	0.000568859	0.0556348	-1.99101
MIRLET7D	-0.716446	2.18221	-3.51965	0.000573995	0.0556509	-1.99945
TRMT12	-0.656207	2.37852	-3.51032	0.000592907	0.0563854	-2.0299
MT-ND4L	-0.890643	10.13	-3.50662	0.000600577	0.0567409	-2.04197
FABP5P7	1.5267	2.6871	3.47707	0.000665161	0.0593579	-2.13782
NBL1	0.588906	4.39058	3.47676	0.000665892	0.0593579	-2.13885
KBTBD12	0.799671	1.1221	3.46619	0.000690563	0.0599438	-2.17297
SLC39A6	-0.614586	4.58929	-3.41838	0.000813286	0.0648706	-2.32622
AC018738.2	0.742561	4.35992	3.39778	0.000872224	0.0675419	-2.39169
RP11-466H18.1	0.659679	4.59058	3.39154	0.000890846	0.0683493	-2.41144
TACSTD2	1.04075	8.41568	3.38455	0.000912157	0.0690526	-2.43355
RNF223	0.657643	1.93036	3.35706	0.00100067	0.0721308	-2.52009
MIR200B	-0.665773	1.23017	-3.34567	0.00103967	0.0739378	-2.55578
MIR621	-0.612488	3.63887	-3.31316	0.00115889	0.0782244	-2.65707
SNHG19	-0.729324	4.82091	-3.30988	0.00117158	0.0788079	-2.66723
HYOU1	-0.587449	4.36269	-3.29941	0.00121305	0.0806679	-2.69965
C1orf186	1.22452	1.96324	3.29764	0.00122019	0.081005	-2.70512
RPL39L	0.816141	4.8515	3.29693	0.00122306	0.081005	-2.70731
GBP2	0.787356	4.32601	3.29402	0.0012349	0.0811508	-2.71628
RP11-572P18.1	0.599639	2.75919	3.29142	0.0012456	0.0814527	-2.72432
ANXA1	1.02312	7.15897	3.27366	0.00132087	0.0845633	-2.77896
LPCAT1	-0.772638	3.5535	-3.26965	0.00133846	0.0849384	-2.79127
FOSB	1.27777	2.68368	3.2643	0.00136224	0.0855735	-2.80766
ZNF185	0.862454	5.03409	3.25494	0.00140479	0.0865205	-2.83628
CD1A	0.808883	1.29907	3.25382	0.00140997	0.086599	-2.8397
HSPA8	-0.585053	7.45379	-3.21609	0.00159506	0.0925753	-2.95434
ZNF541	0.720855	1.47068	3.21338	0.00160918	0.0933023	-2.96253
CSTB	0.83316	7.72067	3.21062	0.00162372	0.0938286	-2.97088
SEC24C	-0.590856	3.03614	-3.20359	0.00166123	0.0950925	-2.99208
ANKRD22	0.80376	3.27839	3.19558	0.00170493	0.0960868	-3.01618
ZFR2	0.64795	1.23819	3.18235	0.00177948	0.0983787	-3.05588
CLCA4	1.29797	2.14684	3.17678	0.00181181	0.0993153	-3.07257
AC115522.3	0.607637	1.76197	3.16407	0.00188751	0.101385	-3.11051
LYPD5	0.658241	2.13733	3.14614	0.0019993	0.104788	-3.16381
RBP7	0.861167	2.15857	3.12508	0.00213846	0.107443	-3.22608
RP1-20N18.4	0.735635	0.781277	3.12179	0.00216101	0.107519	-3.23579
PPIAP29	0.720296	1.90438	3.12139	0.00216376	0.107519	-3.23696
RPL18AP3	0.615361	3.84979	3.10957	0.00224662	0.109044	-3.27171
TMEM47	0.65154	1.49995	3.07366	0.00251679	0.114974	-3.3766
MIR4442	-0.812813	2.63854	-3.07203	0.00252974	0.115213	-3.38133
APOBEC3B	0.790074	3.59845	3.05105	0.00270195	0.120519	-3.44208
RP11-173C1.1	0.762222	1.92078	3.05064	0.00270547	0.120583	-3.44327
APOL1	1.08833	6.48464	3.03395	0.00285032	0.123184	-3.49134
EPHX3	1.28473	3.92911	3.01746	0.00300041	0.126396	-3.53858
ULBP2	0.79818	3.01469	3.00245	0.00314332	0.128432	-3.58139
RIPPLY3	0.633597	1.44697	2.99087	0.00325789	0.130004	-3.61431
ALOX5AP	0.611629	2.83457	2.98819	0.0032849	0.130004	-3.6219
RHBDL2	0.692605	2.71584	2.98809	0.0032859	0.130004	-3.62218
NAPSB	0.613177	1.98955	2.98701	0.00329686	0.130328	-3.62524
AC010677.5	0.629705	0.478954	2.98612	0.00330595	0.130422	-3.62777
MME	-0.865374	1.16628	-2.98028	0.0033659	0.131688	-3.64428
SLC7A5	-0.97893	5.51623	-2.9704	0.00346978	0.132996	-3.6722
ID1	0.764103	6.9624	2.96408	0.00353772	0.134477	-3.69
PIM1	0.632377	5.05749	2.96166	0.00356397	0.134771	-3.69678
RP11-864N7.2	0.660009	3.63382	2.95844	0.00359929	0.135582	-3.70583
ARL4D	0.750393	4.41791	2.9547	0.00364081	0.136969	-3.71636
MLF1	0.729879	3.13493	2.95198	0.00367116	0.137226	-3.72397
RP11-527N22.2	0.645292	1.08081	2.95143	0.00367734	0.13737	-3.72551
FOSL1	0.927583	3.52846	2.94997	0.00369373	0.13763	-3.72959
KCNK6	0.615666	3.33794	2.94667	0.00373115	0.13796	-3.73884
JUNB	0.620424	7.4447	2.92055	0.00403982	0.143562	-3.81168
LINC00925	0.796193	2.35428	2.91733	0.00407947	0.144389	-3.82062
RP11-150O12.1	0.723559	1.40213	2.91383	0.00412288	0.145093	-3.83032
AC005082.12	0.675864	1.34993	2.90099	0.00428599	0.147464	-3.86583
MIR23B	-0.652234	0.950759	-2.89375	0.00438066	0.149313	-3.88581
MUC21	1.15161	1.60633	2.88919	0.00444114	0.150058	-3.89835
MTND4P12	-1.3455	4.23995	-2.88611	0.00448246	0.150455	-3.90681
RAET1L	0.838285	1.65989	2.88575	0.0044874	0.150455	-3.90782
SCD	-0.727086	6.30733	-2.88174	0.00454178	0.151273	-3.91883
CCND1	-0.941385	3.7172	-2.87854	0.00458554	0.152209	-3.92759
ITGB6	0.938667	3.94317	2.87833	0.00458838	0.152217	-3.92816
CDKN2C	0.73926	4.08222	2.84514	0.00506673	0.161216	-4.01869
EGR3	0.613214	1.20245	2.8439	0.0050855	0.161518	-4.02206
DLL1	-0.685182	2.28678	-2.8415	0.00512184	0.16235	-4.02855
RRAD	1.15001	2.74135	2.83004	0.00529899	0.165524	-4.05955
MIR200A	-0.628491	1.64078	-2.79922	0.00580356	0.173149	-4.14235
FAT1	-0.646019	3.44137	-2.79064	0.0059516	0.176078	-4.16526
GALNT14	0.735058	2.4214	2.7851	0.00604913	0.177751	-4.18003
PADI3	1.0998	1.70352	2.76377	0.00643775	0.182999	-4.23659
RIBC2	0.587428	2.81089	2.74897	0.00672073	0.18677	-4.27562
AC246787.4	-0.653925	1.0751	-2.71995	0.00730851	0.194406	-4.35158
NMB	0.648887	3.91164	2.69566	0.00783599	0.200843	-4.41462
MT-ND5	-0.675245	9.86436	-2.6861	0.00805275	0.203842	-4.43927
DAPL1	1.14012	2.53581	2.68517	0.00807426	0.204083	-4.44168
HSPB1	0.762788	9.9157	2.67671	0.00827094	0.206373	-4.46341
MT-TY	0.614899	2.23762	2.67547	0.00830013	0.20662	-4.46659
MIR27B	-0.737032	1.41822	-2.67438	0.00832605	0.206865	-4.46941
APOBEC3A	1.04348	2.1783	2.66791	0.00848035	0.2089	-4.48598
IER3	0.671034	6.08136	2.66336	0.0085906	0.20934	-4.49763
GIPC2	0.618361	1.5589	2.66082	0.00865251	0.209711	-4.5041
GJB4	0.639871	1.89676	2.65209	0.00886887	0.213185	-4.52637
PRSS23	-0.600715	2.74073	-2.63317	0.00935461	0.218605	-4.57439
CAPN14	0.6589	0.961353	2.62946	0.00945256	0.219498	-4.58377
RP11-323C15.2	0.920065	2.53813	2.62796	0.00949231	0.219615	-4.58754
CXCL17	1.36129	5.76152	2.62206	0.00965076	0.22158	-4.60244
NDUFA4L2	1.21951	4.4176	2.60017	0.0102591	0.228312	-4.65738
CHST2	-0.719249	2.12408	-2.59674	0.0103576	0.22942	-4.66596
CCDC60	0.600439	0.907654	2.58819	0.0106068	0.232293	-4.68729
HOXA11	-0.602934	1.45015	-2.58572	0.0106796	0.233191	-4.69343
CD207	0.697744	1.51598	2.57664	0.0109515	0.2363	-4.71598
DUOX1	0.680682	3.22488	2.57463	0.0110127	0.237007	-4.72098
CD82	0.587342	5.34934	2.57236	0.0110819	0.237774	-4.72659
FAM110C	0.62765	3.35027	2.55505	0.0116236	0.244858	-4.76933
LDHB	-0.686961	6.14526	-2.52809	0.0125142	0.254104	-4.83536
FOXD1	0.633124	2.06397	2.52621	0.0125784	0.255006	-4.83993
SFRP4	1.09768	2.66236	2.50257	0.013413	0.263596	-4.89726
KRT78	0.823346	1.57808	2.49939	0.0135291	0.264919	-4.90494
ABO	0.752334	1.98205	2.48629	0.0140162	0.268492	-4.93646
CTD-2566J3.1	0.72676	0.707512	2.45915	0.0150755	0.279569	-5.00127
SOCS3	0.633761	5.08054	2.45127	0.0153959	0.282947	-5.01995
FCGBP	0.939608	2.18815	2.45032	0.0154349	0.283306	-5.0222
KRT13	2.08381	6.19906	2.44917	0.0154824	0.283992	-5.02493
IGKV1D-13	-0.772142	1.19659	-2.43536	0.0160617	0.288977	-5.05752
GJB3	0.794497	4.96841	2.43205	0.0162036	0.289986	-5.06532
PRSS27	0.676982	1.59382	2.43131	0.0162356	0.290247	-5.06707
FAM46B	0.708592	3.59478	2.43109	0.0162451	0.290273	-5.06759
S100A2	1.4133	8.31743	2.40542	0.0173848	0.298148	-5.12764
IL32	0.65589	4.72277	2.40535	0.0173877	0.298148	-5.12779
MUC20	0.847694	2.89354	2.40441	0.0174311	0.298164	-5.13
GBP6	1.13353	2.89987	2.40076	0.017599	0.299142	-5.13848
HBA2	-0.853847	2.54542	-2.39975	0.0176456	0.299499	-5.14082
OSBP2	-0.620357	1.98388	-2.38312	0.0184318	0.305996	-5.17933
KRT19	1.0092	8.9787	2.38195	0.0184882	0.306224	-5.18203
IGHV3-20	-0.745268	1.36684	-2.37765	0.0186969	0.308466	-5.19194
PVRL4	0.649686	5.36315	2.3768	0.0187385	0.308713	-5.1939
IGHV3-64	-0.638721	0.995002	-2.36923	0.0191115	0.310479	-5.21129
LYPD2	1.23297	2.31624	2.36168	0.0194902	0.312802	-5.22859
IFI16	0.693165	5.54558	2.34288	0.0204626	0.320481	-5.27147
TPSB2	0.630242	1.98052	2.32318	0.0215271	0.329463	-5.31606
VAV3	0.607865	3.17242	2.3223	0.0215758	0.329604	-5.31804
IGHV4-55	-0.643123	1.41433	-2.31219	0.0221417	0.33414	-5.34077
TMPRSS4	0.721985	3.77897	2.31	0.022266	0.33463	-5.34568
SFN	0.903789	9.77042	2.30933	0.0223042	0.33469	-5.34719
CLEC2B	0.871501	3.82594	2.2954	0.0231106	0.341479	-5.37833
PLTP	-0.614977	4.90434	-2.29426	0.023178	0.341786	-5.38088
EYA2	0.803063	4.18095	2.29124	0.0233562	0.343073	-5.38758
RNF212	0.586762	2.14683	2.27993	0.0240361	0.347578	-5.4127
IVL	1.30486	3.62387	2.2754	0.0243132	0.349649	-5.42273
SUSD4	0.741885	3.01444	2.25949	0.0253088	0.356006	-5.4578
LGALS7B	1.49644	4.77164	2.2494	0.0259582	0.360433	-5.47991
B4GALNT4	-0.652032	1.69938	-2.24537	0.0262217	0.36254	-5.48872
LY6D	1.51375	6.52743	2.23573	0.0268616	0.365385	-5.50973
TMPRSS11B	0.642957	0.832375	2.23534	0.0268874	0.365385	-5.51056
RP5-857K21.6	-0.718352	5.52334	-2.23534	0.0268875	0.365385	-5.51057
IGHV3-11	-1.17313	3.60295	-2.23525	0.0268936	0.365385	-5.51077
SLC39A2	0.678436	1.75881	2.2171	0.0281366	0.372941	-5.55009
IGKV2-29	-0.788859	1.07165	-2.21669	0.028165	0.373065	-5.55097
CLEC7A	0.640907	2.00851	2.21499	0.0282841	0.373877	-5.55464
ZNF750	0.784426	3.59999	2.21435	0.0283288	0.373877	-5.55601
MIR429	-0.604317	2.92807	-2.21381	0.028367	0.373877	-5.55718
MMP13	0.902439	1.72018	2.20662	0.0288767	0.376765	-5.57265
GPNMB	0.832197	4.89864	2.19859	0.0294552	0.378445	-5.58987
EMP1	0.690638	4.46114	2.19013	0.0300753	0.379901	-5.60795
AMTN	0.835026	1.43925	2.18346	0.0305726	0.379901	-5.62216
FAM83C	0.863496	2.18726	2.17072	0.0315419	0.379901	-5.64919
SERPINB7	-0.702219	2.05367	-2.16623	0.0318894	0.379901	-5.65867
TMEM40	0.699759	2.60041	2.16313	0.0321316	0.379901	-5.66522
TMPRSS11E	1.02114	2.47534	2.15782	0.0325498	0.379901	-5.67639
NR4A1	0.621034	2.39681	2.15521	0.0327572	0.379901	-5.68188
UGT8	0.610535	1.55742	2.15052	0.0331326	0.379988	-5.69172
KCNS1	0.628283	2.11599	2.14815	0.0333244	0.379988	-5.69671
FUT6	0.585969	1.26401	2.14123	0.0338876	0.3813	-5.71117
FUT3	0.686985	2.99549	2.13573	0.0343418	0.382573	-5.72265
SMIM22	0.765874	3.73432	2.12999	0.0348209	0.384797	-5.73459
CX3CL1	0.673429	3.29194	2.12718	0.035058	0.385827	-5.74044
PXDN	-0.651076	2.58356	-2.11072	0.036472	0.3907	-5.77446
HBB	-0.949889	3.37975	-2.09497	0.0378715	0.397556	-5.80681
IGHV3-73	-0.92532	2.38732	-2.09294	0.0380558	0.39813	-5.81097
IGKV2-30	-0.645308	1.4015	-2.07868	0.039367	0.404455	-5.84001
SCNN1B	0.70032	2.26195	2.07288	0.0399116	0.406916	-5.85178
MT1L	-0.679482	2.25398	-2.04848	0.0422749	0.415017	-5.90095
MMP7	0.916901	2.94709	2.04562	0.0425589	0.416252	-5.90666
IGHJ3P	-0.6597	1.71017	-2.04373	0.0427477	0.416903	-5.91044
CNFN	0.855969	4.82913	2.03361	0.0437715	0.421228	-5.93062
HLA-DRB5	0.774607	6.20309	2.03307	0.0438275	0.421228	-5.93171
AQP3	0.967759	6.99332	2.03075	0.044065	0.421989	-5.93631
CXCL10	0.962247	4.93585	2.0281	0.0443379	0.422861	-5.94157
MTND2P28	-0.593912	6.28689	-2.02086	0.0450913	0.426659	-5.95591
TMPRSS11D	1.18492	3.07734	2.01726	0.0454707	0.428203	-5.96303
IGHV3-72	-0.685145	1.67681	-2.01138	0.0460955	0.430689	-5.97463
IDO1	0.874169	3.82664	2.00903	0.0463465	0.431262	-5.97925
TMPRSS11A	0.957197	1.88723	2.00897	0.0463533	0.431262	-5.97937
GLDC	-0.623194	1.14379	-2.00511	0.0467686	0.433097	-5.98694
IL1RN	0.812217	4.85775	2.00368	0.0469237	0.433502	-5.98976
CA9	0.857616	4.19416	1.98888	0.0485518	0.439974	-6.01868
SERPINE1	0.698699	3.89192	1.98235	0.0492861	0.443526	-6.03139
LINC01133	0.737675	3.25416	1.98088	0.0494518	0.44387	-6.03424
ADH1C	0.721566	1.15929	1.9798	0.0495744	0.444419	-6.03633
